# Supplementary material
Source: ML conference proceedings conference paper supplement (https://proceedings.neurips.cc/paper_files/paper/2016/hash/466accbac9a66b805ba50e42ad715740-Abstract.html)
Supplement: Supplementary file [file 466accbac9a66b805ba50e42ad715740-Supplemental.zip]

## A Proof of Theorem 3.1

In order to prove Theorem 3.1, it suffices to show that for any  $k \in [i, j-1]$ ,  $\mathbb{P}(a_k|S) = e^{-\theta} \cdot \mathbb{P}(a_{k+1}|S)$ . For a fixed  $k$ , let  $A = \{\sigma : a_k \succ_\sigma a_j, \forall a_j \in S \setminus \{a_k\}\}$  and  $B = \{\sigma : a_{k+1} \succ_\sigma a_j, \forall a_j \in S \setminus \{a_{k+1}\}\}$ . Let  $f : A \rightarrow B$  be the function which switches the position of  $a_k$  and  $a_{k+1}$ . Note that it is a bijection from  $A$  to  $B$ . Consequently, we can write

$$\mathbb{P}(a_k|S) = \sum_{\sigma \in A} \frac{e^{-\theta \cdot d(\sigma, w)}}{\psi(\theta)} \quad \text{and} \quad \mathbb{P}(a_{k+1}|S) = \sum_{\sigma \in A} \frac{e^{-\theta \cdot d(f(\sigma), w)}}{\psi(\theta)}.$$

We next show that for all  $\sigma \in A$ ,  $d(f(\sigma), w) = d(\sigma, w) + 1$ , which in turn implies the desired result. Because  $S$  is a contiguous set,  $a_k$  and  $a_{k+1}$  are consecutive items in  $w$ . This implies that in any fixed  $\sigma$ , any disagreement between  $a_k$  and some  $a_j$  with  $a_j \neq a_{k+1}$  will induce a disagreement between  $a_{k+1}$  and  $a_j$  in  $f(\sigma)$ . Similarly, any disagreement between  $a_{k+1}$  and some  $a_j$  with  $a_j \neq a_k$  in  $\sigma$  will induce a disagreement between  $a_k$  and  $a_j$  in  $f(\sigma)$ . Consequently, the only additional disagreement in  $f(\sigma)$  comes from the disagreement between  $a_k$  and  $a_{k+1}$  after being switched. This implies that for all  $\sigma \in A$ ,  $d(f(\sigma), w) = d(\sigma, w) + 1$  and concludes the proof.

## B Proof of Theorem 3.2 (continued)

In this section, we prove that for a fixed  $R$ ,  $\sum_{\sigma \in h(R)} e^{-\theta \cdot C_3(\sigma)}$  is equal to

$$\psi(|G| - m_0, \theta) \cdot \psi(|S| + m_0, \theta) \cdot \frac{e^{-\theta \cdot (k-1 - \sum_{m=1}^{\ell-1} r_m)}}{1 + \dots + e^{-\theta \cdot (|S| + m_0 - 1)}} \cdot \prod_{m=1}^M \frac{\psi(|G_m|, \theta)}{\psi(r_m, \theta) \cdot \psi(|G_m| - r_m, \theta)}.$$

We use a similar approach than in the first part of the proof. Let  $\Gamma$  be the set of  $(\tilde{G}_1, \dots, \tilde{G}_M) \subseteq (G_1, \dots, G_M)$  such that  $|\tilde{G}_m| = r_m$  for all  $m \in [M]$ . For all  $\gamma = (\tilde{G}_1, \dots, \tilde{G}_M) \in \Gamma$ , let  $t(\gamma)$  be the set of permutations  $\sigma$  which satisfy the following two conditions:

- $\sigma \in h(R)$ .
- for all  $m \in [M]$ , the subset of products from  $G_m$  which is preferred to  $a_k$  is exactly  $\tilde{G}_m$ .

With this notation, we can write

$$\sum_{\sigma \in h(R)} e^{-\theta \cdot C_3(\sigma)} = \sum_{\gamma \in \Gamma} \sum_{\sigma \in t(\gamma)} e^{-\theta \cdot (D_1(\sigma) + D_2(\sigma) + \sum_{m \in [M]} D_3(\sigma, m))},$$

where,

- $D_1(\sigma)$  is the sum of disagreements  $\xi(\sigma, i, j)$  over pairs of products  $(i, j)$  such that either  $i = k$  and  $a_k \succ_\sigma a_j$  or  $a_k \succ_\sigma a_i$  and  $a_k \succ_\sigma a_j$ .
- $D_2(\sigma)$  is the sum of disagreements  $\xi(\sigma, i, j)$  over pairs of products  $(i, j)$  such that  $a_i \succ_\sigma a_k$  and  $a_j \succ_\sigma a_k$ .
- for all  $m \in [M]$ ,  $D_3(\sigma, m)$  is the sum of disagreements  $\xi(\sigma, i, j)$  over pairs of products  $(i, j)$  such that  $a_i \in \tilde{G}_m$  and  $a_j \in G_m \setminus \tilde{G}_m$ .

Using the definition of  $D_1(\sigma)$  and  $D_2(\sigma)$  together with Theorem 3.1, we have that  $\sum_{\sigma \in t(\gamma)} e^{-\theta \cdot (D_1(\sigma) + D_2(\sigma) + \sum_{m \in [M]} D_3(\sigma, m))}$  is equal to

$$\psi(|G| - m_0, \theta) \cdot \psi(|S| + m_0, \theta) \cdot \frac{e^{-\theta \cdot (k-1 - \sum_{m=1}^{\ell-1} r_m)}}{1 + \dots + e^{-\theta \cdot (|S| + m_0 - 1)}} \cdot \sum_{\sigma \in t(\gamma)} e^{-\theta \cdot \sum_{m \in [M]} D_3(\sigma, m)}.$$

To complete the proof, it remains to compute  $\sum_{\gamma \in \Gamma} \sum_{\sigma \in t(\gamma)} e^{-\theta \cdot \sum_{m \in [M]} D_3(\sigma, m)}$ . Using the definition of the normalization constant, we have for all  $m \in [M]$ ,

$$\psi(|G_m|, \theta) = \psi(r_m, \theta) \cdot \psi(|G_m| - r_m, \theta) \cdot \sum_{\gamma \in \Gamma} \sum_{\sigma \in t(\gamma)} e^{-\theta \cdot D_3(\sigma, m)},$$

which implies that

$$\sum_{\gamma \in \Gamma} \sum_{\sigma \in t(\gamma)} e^{-\theta \cdot \sum_{m \in [M]} D_3(\sigma, m)} = \prod_{m=1}^M \frac{\psi(|G_m|, \theta)}{\psi(r_m, \theta) \cdot \psi(|G_m| - r_m, \theta)},$$

and concludes the proof.

## C Proof of Theorem 5.1

Let  $x = (x_1, \dots, x_n)$  be a feasible binary vector to the IP and let  $S = \{a_i : x_i = 1\}$ . Note that there is a one to one correspondence between feasible vector  $x$  to the IP and feasible assortment  $S$  such that  $a_1 \in S$  and  $a_q \in S$ . In particular,  $x_i = 1$  if  $i \in S$  and  $x_i = 0$  otherwise. Consequently, we can rewrite the IP as

$$\begin{aligned}
& \max_{\substack{S \subseteq \mathcal{U} \\ a_q \in S}} \max_{i,s} \sum_{i,s} r_i \cdot \pi(i, s, n) \\
& \text{s.t. } \pi(i, s, k+1) = (1 - w_{k+1,s}) \cdot \pi(i, s, k) + y_{i,s,k+1}, & \forall i, s, \forall k \geq 2 \\
& \pi(k+1, s, k+1) = z_{s,k+1}, & \forall s, \forall k \geq 2 \\
& 0 \leq y_{i,s,k} \leq \mathbf{1}[a_{k+1} \notin S] \cdot \gamma_{k+1,s-1} \cdot \pi(i, s-1, k-1), & \forall i, s, \forall k \geq 2 \\
& 0 \leq z_{s,k} \leq \mathbf{1}[a_{k+1} \in S] \cdot p_{k+1,s} \cdot \sum_{\ell=s}^n \sum_{i=1}^{k-1} \pi(i, \ell, k-1), & \forall s, \forall k \geq 2 \\
& \pi(1, 1, 1) = 1
\end{aligned}$$

Note that it is always optimal to set  $y_{i,s,k}$  and  $z_{s,k}$  at their upper bound because all the coefficients in the objective function are non-negative. The correctness of Algorithm 1 then shows that the IP is an equivalent formulation of (2).
